# Supplementary material for: C-reactive protein levels in patients at cardiovascular risk: EURIKA study
Source: PubMed Central journal article supplement (PMC3943833; doi:10.1186/1471-2261-14-25), 2014-02-24
Supplement: 1471-2261-14-25-S1.pdf [file 1471-2261-14-25-S1.pdf]

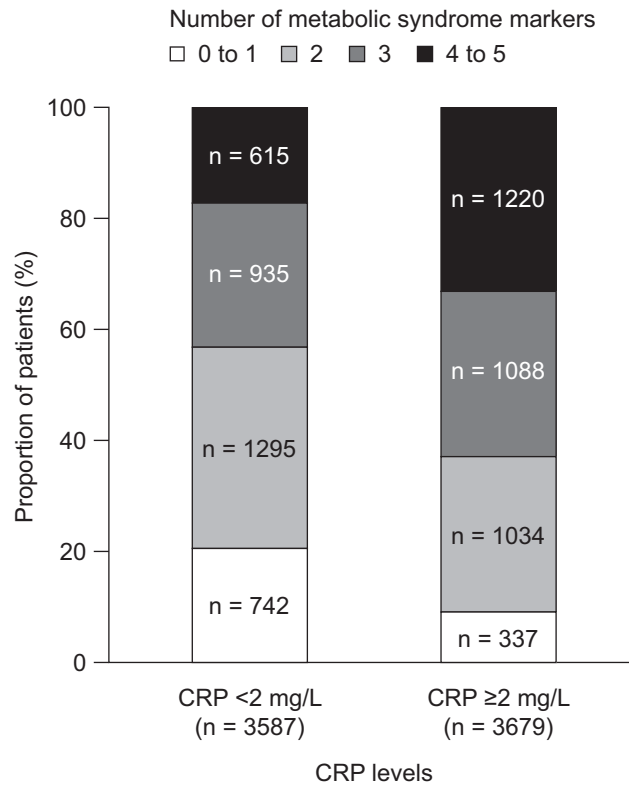

**Additional file 1: Figure S1.** Number of metabolic syndrome components present in patients with CRP levels <2 mg/L and ≥2 mg/L.

Halcox *et al.*: C-reactive protein levels in patients at cardiovascular risk: EURIKA study. *BMC Cardiovascular Disorders* 2014 **14**:25.
