# Supplementary material for: C-reactive protein levels in patients at cardiovascular risk: EURIKA study
Source: PubMed Central journal article supplement (PMC3943833; doi:10.1186/1471-2261-14-25), 2014-02-24
Supplement: 1471-2261-14-25-S2.pdf [file 1471-2261-14-25-S2.pdf]

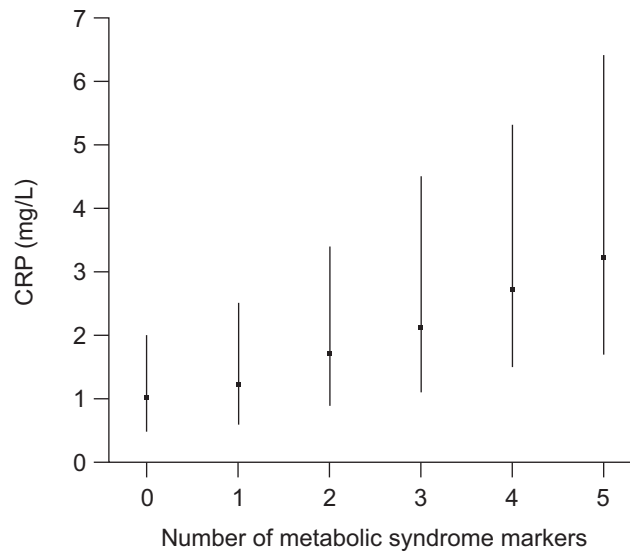

**Additional file 2: Figure S2.** Mean (IQR) of CRP levels in patients with different numbers of metabolic syndrome components.

Halcox *et al.*: **C-reactive protein levels in patients at cardiovascular risk: EURIKA study.** *BMC Cardiovascular Disorders* 2014 **14**:25.
