# Supplementary material for: C-reactive protein levels in patients at cardiovascular risk: EURIKA study
Source: PubMed Central journal article supplement (PMC3943833; doi:10.1186/1471-2261-14-25), 2014-02-24
Supplement: 1471-2261-14-25-S3.pdf [file 1471-2261-14-25-S3.pdf]

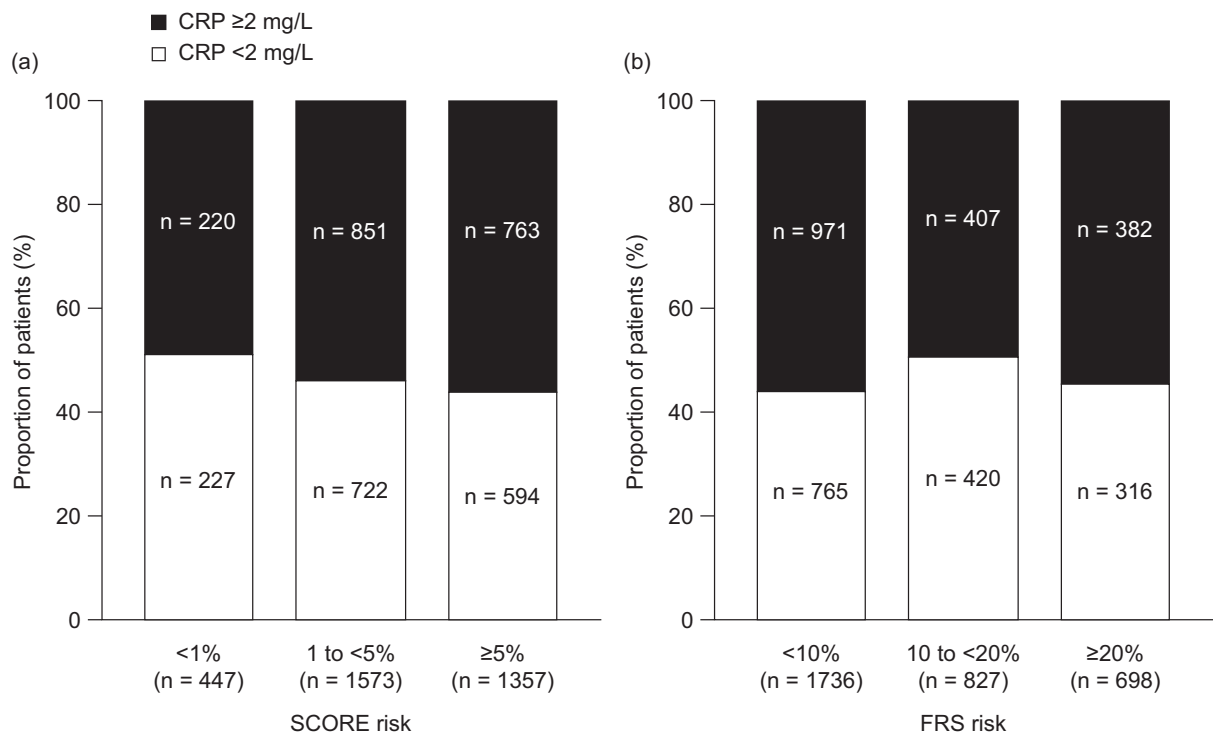

**Additional file 3: Figure S3.** CRP levels as a two-category variable (<2 mg/L and ≥2 mg/L) according to predicted cardiovascular risk levels by (a) SCORE and (b) FRS, in patients without diabetes mellitus who were not receiving statin treatment.
